# Supplementary material for: NF-κB promotes leaky expression of adenovirus genes in a replication-incompetent adenovirus vector
Source: PubMed Central journal article supplement (PMC4728692; doi:10.1038/srep19922), 2016-01-27
Supplement: srep19922-s1.pdf [file srep19922-s1.pdf]

## **SUPPLEMENTARY MATERIAL**

### **NF- $\kappa$ B promotes leaky expression of adenovirus genes in a replication-incompetent adenovirus vector**

M. Machitani, F. Sakurai, K. Wakabayashi, K. Nakatani, K. Shimizu, M. Tachibana, and H. Mizuguchi

#### **Supplementary Materials and Methods**

##### ***Cell viability assay***

Cells were treated with BAY11-7082 and MG-132. After 24-h incubation, cell viabilities were determined by staining with AlamarBlue (Life Technologies, Carlsbad, CA) according to the manufacturer's instructions. Cell viabilities of DMSO-treated cells were normalized to 100%.

## Supplementary Figures

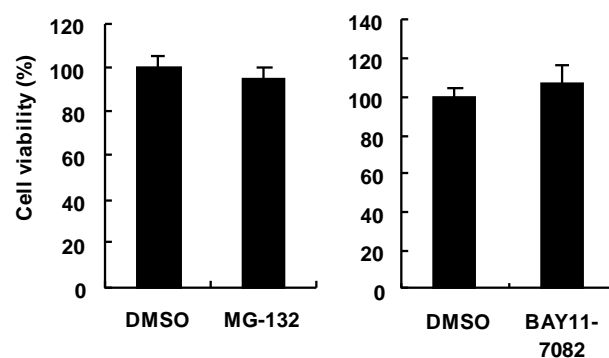

**Figure S1 Cell viability following treatment of MG-132 and BAY11-7082.**

HeLa cells were treated with MG-132 and BAY11-7082 at 2.5 mM and 10 mM, respectively. After 24-h incubation, cell viability was determined by AlamarBlue assay. Cell viabilities of DMSO-treated cells were normalized to 100%. These data are expressed as the means  $\pm$  S.D. (n=4).

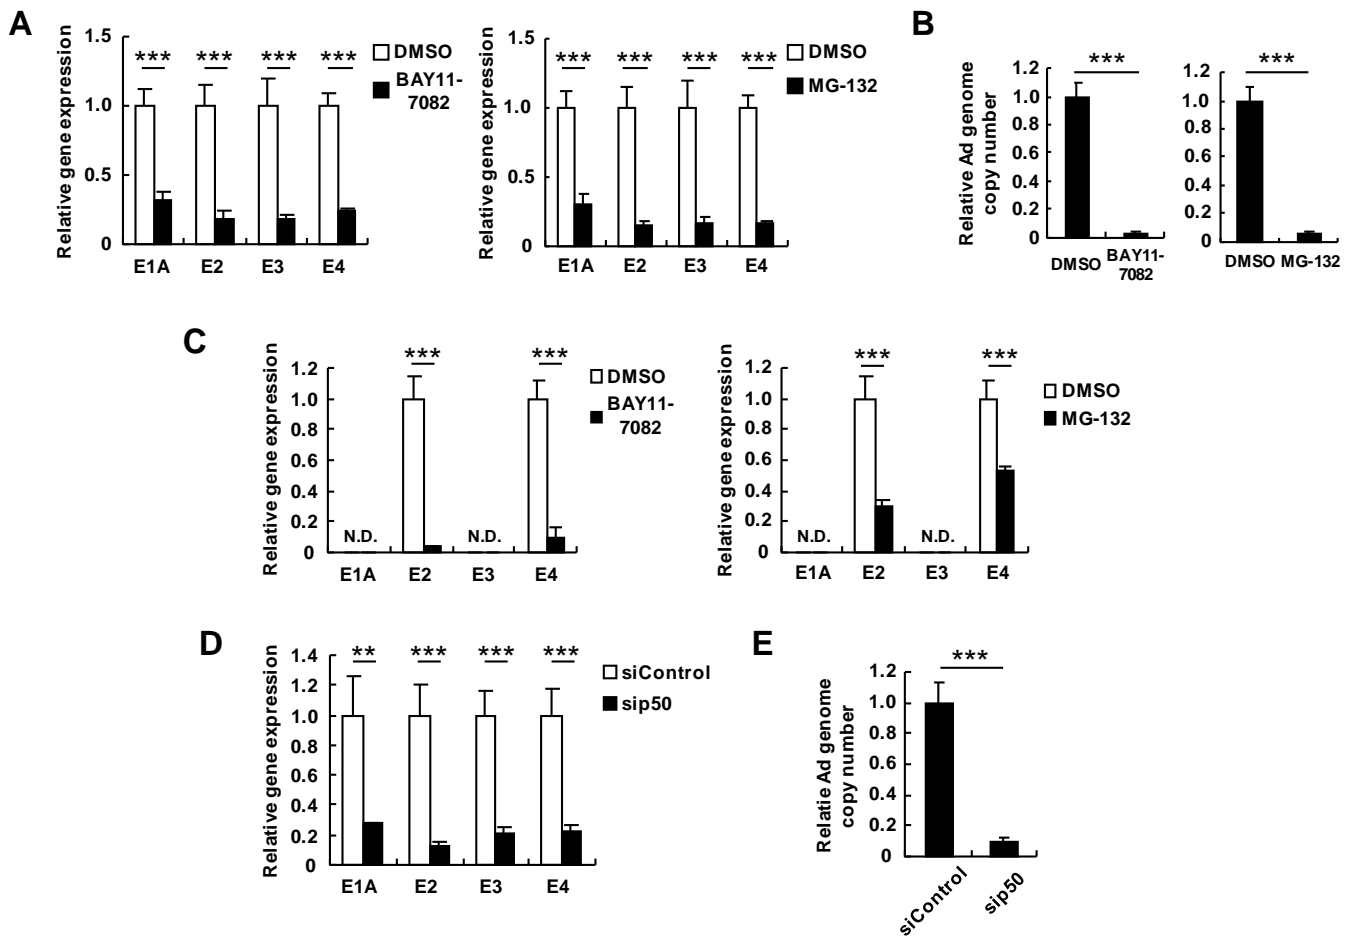

**Figure S2 Suppression of Ad early gene expression and Ad replication by inhibition of NF- $\kappa$ B.**

(A-C) H1299 cells were pre-treated with BAY11-7082 and MG-132 at 10 mM and 2.5 mM, respectively, for 1 h, followed by infection with WT-Ad or Adv-CMVLuc at 100 VP/cell. After 12-h incubation, the E1A, E2, E3, and E4 mRNA levels in the cells were determined by quantitative RT-PCR (A, C). After 24-h incubation, Ad genome copy numbers in the cells were determined by real-time PCR (B). (D, E) H1299 cells were transfected with sip50 at 50 nM, followed by infection with WT-Ad at 100 VP/cell. After 12-h incubation, Ad gene mRNA levels in the cells were similarly determined (D). After 24-h incubation, Ad genome copy numbers in the cells were similarly determined (E). These data are expressed as the means  $\pm$  S.D. (n=3-4). \*\*p<0.01, \*\*\*p<0.001.

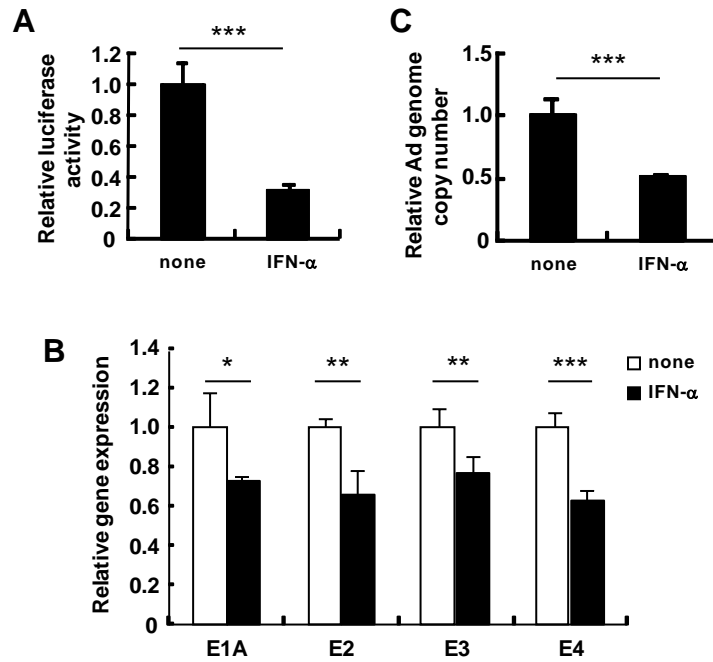

**Figure S3 Suppression of Ad early gene expression and replication by IFN- $\alpha$  stimulation.**

(A) HeLa cells were transfected with pNF- $\kappa$ B-Luc, followed by treatment with IFN- $\alpha$  at 1000 U/ml. After 24-h incubation, luciferase activity was determined. The data show FLuc activity normalized by RLuc activity. (B) HeLa cells were pre-treated with IFN- $\alpha$  at 1000 U/ml for 5 h, followed by infection with WT-Ad at 100 VP/cell. After 12-h incubation, the E1A, E2, E3, and E4 mRNA levels in the cells were determined by quantitative RT-PCR. (C) HeLa cells were pre-treated with IFN- $\alpha$  at 1000 U/ml for 5 h, followed by infection with WT-Ad at 100 VP/cell. After 24-h incubation, Ad genome copy numbers in the cells were determined by quantitative PCR. These data are expressed as the means  $\pm$  S.D. (n=3-4). \*p<0.05, \*\*p<0.01, \*\*\*p<0.001.

**Table S1****The oligonucleotides and primers used in this study**

| No | name        | sequence                                                   |
|----|-------------|------------------------------------------------------------|
| 1  | E1Ap-F      | atactcgagcatcatcaataatactattttggattga                      |
| 2  | E1Ap-R      | tataagcttgctggagcggctcggag                                 |
| 3  | E1Bp-F      | atactcgagggtctagagaatgcaatagtag                            |
| 4  | E1Bp-R      | ataaagcttaaccaagattgcccacgg                                |
| 5  | E2p-F       | atactcgagtaggattgcctgacgaggcg                              |
| 6  | E2p-R       | ataaagcttactgcgcgctgactcttaagg                             |
| 7  | E3p-F       | atactcgaggcagctgcctgtatcacaaa                              |
| 8  | E3p-R       | ataaagcttagctgaatactcgcctct                                |
| 9  | E4p-F       | gcgaagcttcagtcagcctaccagtaaaaaag                           |
| 10 | E4p-R       | gcgctcgagcatcatcaataatactattttgg                           |
| 11 | E2-del2-F   | atactcgaggctgtaactccacatgtag                               |
| 12 | E2-del2-R   | atggtggctttaccaacag                                        |
| 13 | E2-del3-S   | tcgagctggagatgacgtagtttcgcgctaaattgagaaagggcgcgaaactagtc   |
| 14 | E2-del3-AS  | ttaagactagtttcgcgccctttctcaaatttaagcgcgaaaactacgcatctccagc |
| 15 | E2-del2.1-F | gtaactccacatgtagggcgtcaattgctcataatggcgctg                 |
| 16 | E2-del2.1-R | cagcgccattatgagcaattgacgcctacatgtggagtac                   |
| 17 | DNikBa-F    | tgtctagacagccatgtttcagccagc                                |
| 18 | DNikBa-R    | aagcggcgcgtataatgtcagacgctggcc                             |
| 19 | E1A-F       | tccggtccttctaacacacctc                                     |
| 20 | E1A-R       | acggcaactggttaatggg                                        |
| 21 | E2-F        | cactacggtgcgagtgcaa                                        |
| 22 | E2-R        | ggtagctgcctcccaaaaag                                       |
| 23 | E3-F        | aacacctggtccactgtcgc                                       |
| 24 | E3-R        | agctcggagaggttctctcgtag                                    |
| 25 | E4-F        | gggatcgtctacctctttga                                       |
| 26 | E4-R        | gggcagcagcggatgat                                          |
| 27 | pIX-F       | gcccgcgggatttg                                             |
| 28 | pIX-R       | cgggaagctgcactgctt                                         |
| 29 | p50-F       | aacagagaggatttcgtttccg                                     |
| 30 | p50-R       | ttgacctgagggttaagacttct                                    |
| 31 | hGAPDH-F    | ggtggtctcctctgactcaaca                                     |
| 32 | hGAPDH-R    | gtggtcgttgagggaatg                                         |

|    |              |                        |
|----|--------------|------------------------|
| 33 | mGAPDH-F     | caatgtgtccgtcgtggatct  |
| 34 | mGAPDH-R     | gtcctcagtgtagcccaagatg |
| 35 | ChIP E2/E3-F | agcgcgaaaactacgcatc    |
| 36 | ChIP E2/E3-R | tcccattgtggctggtaac    |
